# Supplementary material for: Investigating sources of inaccuracy in wearable optical heart rate sensors
Source: PubMed Central journal article supplement (PMC7010823; doi:10.1038/s41746-020-0226-6), 2020-02-10
Supplement: 41746_2020_226_MOESM1_ESM.pdf [file 41746_2020_226_MOESM1_ESM.pdf]

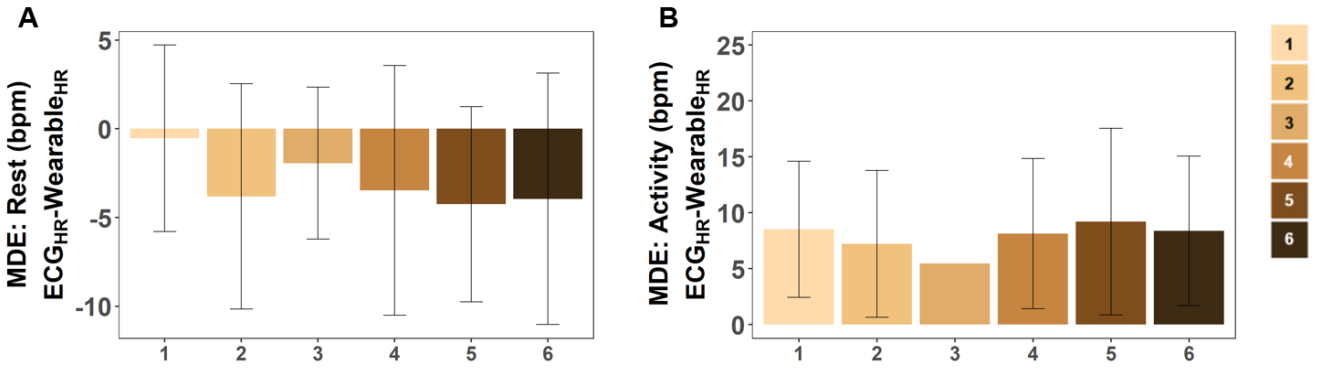

1

2 **Supplementary Figure 1.** Mean Error in heart rate (bpm) across skin tones and devices at (A)  
 3 rest and (B) during walking activity. Error is calculated as the difference between the ECG and  
 4 wearable reported heart rate at every simultaneous measurement. Fitzpatrick skin tones 1-6 are  
 5 represented with an approximately equal number of participants in each skin tone. Error bars  
 6 represent the 95% confidence interval.

7

8

9

10

11

12

13

14

15

16

17

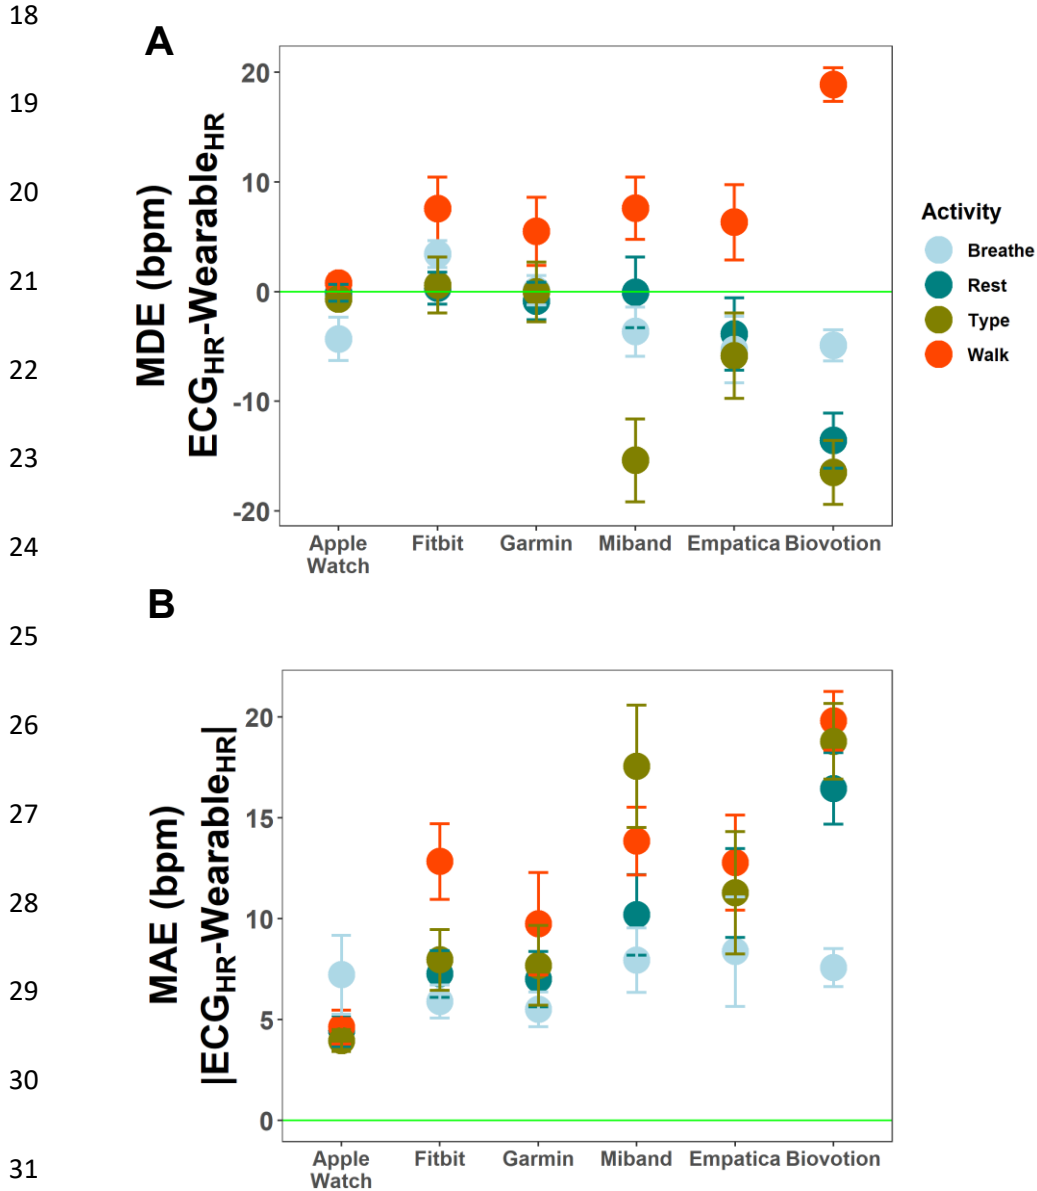

32 **Supplementary Figure 2. (A)** Mean Directional Error in heart rate (bpm) across devices during  
 33 rest (teal), breathing (light blue), typing (green), and activity (orange) shows the relative  
 34 differences from the ECG. The green horizontal line represents no error (no difference from the  
 35 true measurement of HR from ECG). Error bars show the 95% confidence interval. **(B)** Mean  
 36 Absolute Error in Heart Rate (bpm) across devices during rest (teal), breathing (light blue),  
 37 typing (green), and activity (orange). This shows the true difference in HR from the ECG but  
 38 does not show the sign of the difference. The green horizontal line represents no error (no

39 difference from the true measurement of HR from ECG). Error bars show the 95% confidence  
40 interval.

41

42

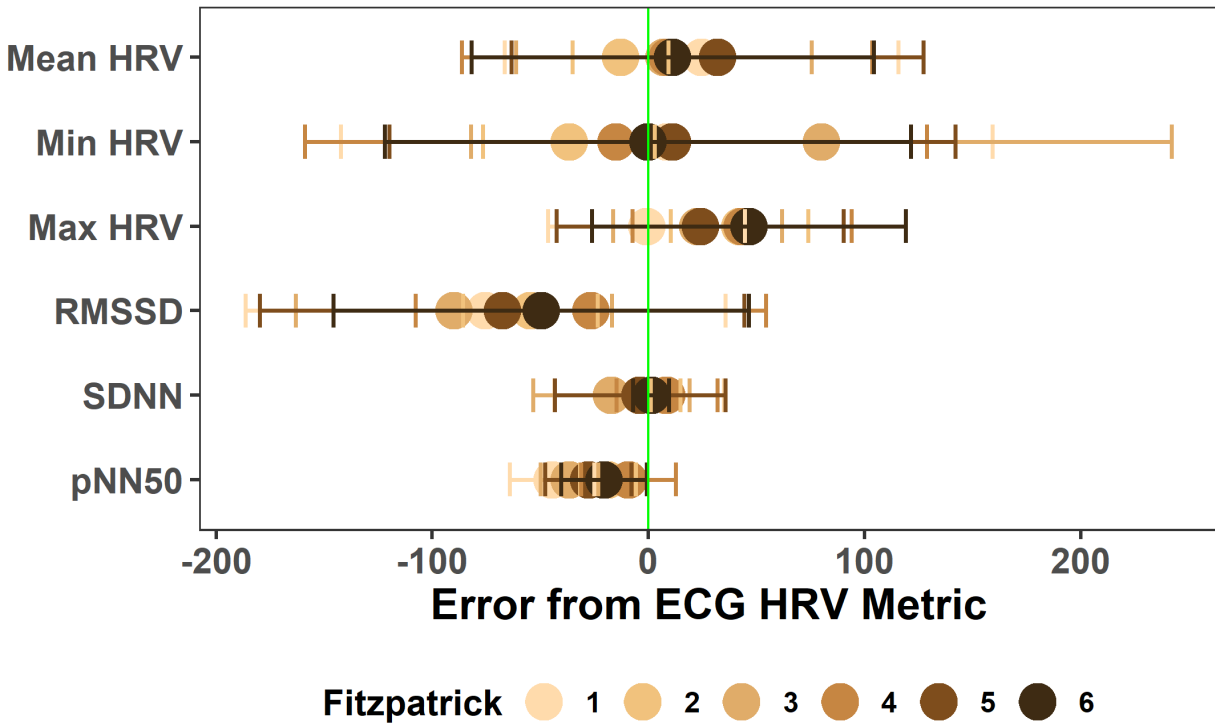

43

44

45 **Supplementary Figure 3.** Error in optical HRV time-domain metrics across skin tones.

46 Standard HRV time-domain metrics include: Mean Heart Rate Variability, Minimum Heart Rate

47 Variability, Maximum Heart Rate Variability, RMSSD, SDNN, and pNN50. The green vertical line

48 represents no error (no difference from the true metric of HRV from the ECG).

49

50

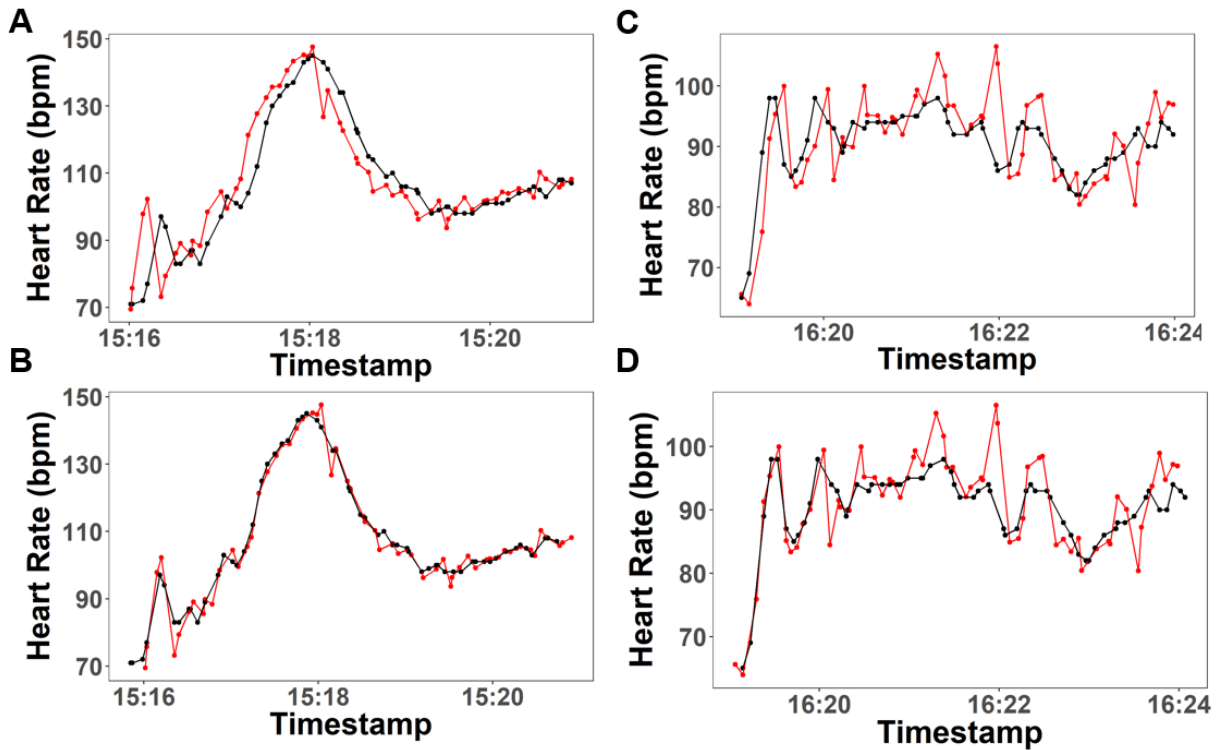

52

53

54 **Supplementary Figure 4. (A) Original Signal, Fixed Lag (B) Lag Correction on Fixed Lag**

55 **Signal (C) Original Signal, Dynamic Lag (D) Attempted Lag Correction on Dynamic Lag Signal;**

56 **ECG HR is shown in red and Wearable HR is shown in black.**

57

58

59

60

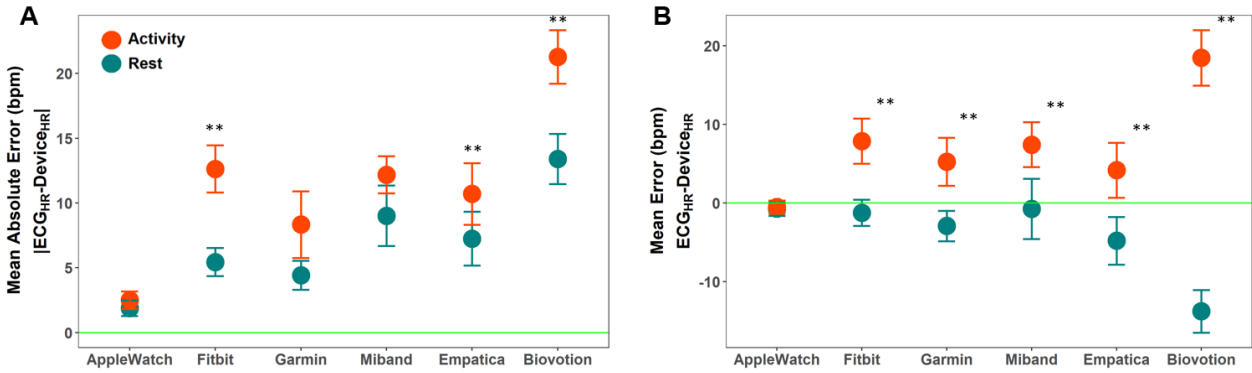

61

62 **Supplementary Figure 5.** With optimized window length for each participant, device, and  
 63 activity condition: **(A)** Mean Directional Error in heart rate (bpm) across devices during rest (teal)  
 64 and activity (orange) shows the relative differences from the ECG. The green horizontal line  
 65 represents no error (no difference from the true measurement of HR from ECG). Error bars  
 66 show the 95% confidence interval. **(B)** Mean Absolute Error in Heart Rate (bpm) across devices  
 67 during rest (teal) and activity (orange). This shows the true difference in HR from the ECG but  
 68 does not show the sign of the difference. The green horizontal line represents no error (no  
 69 difference from the true measurement of HR from ECG). Error bars show the 95% confidence  
 70 interval.

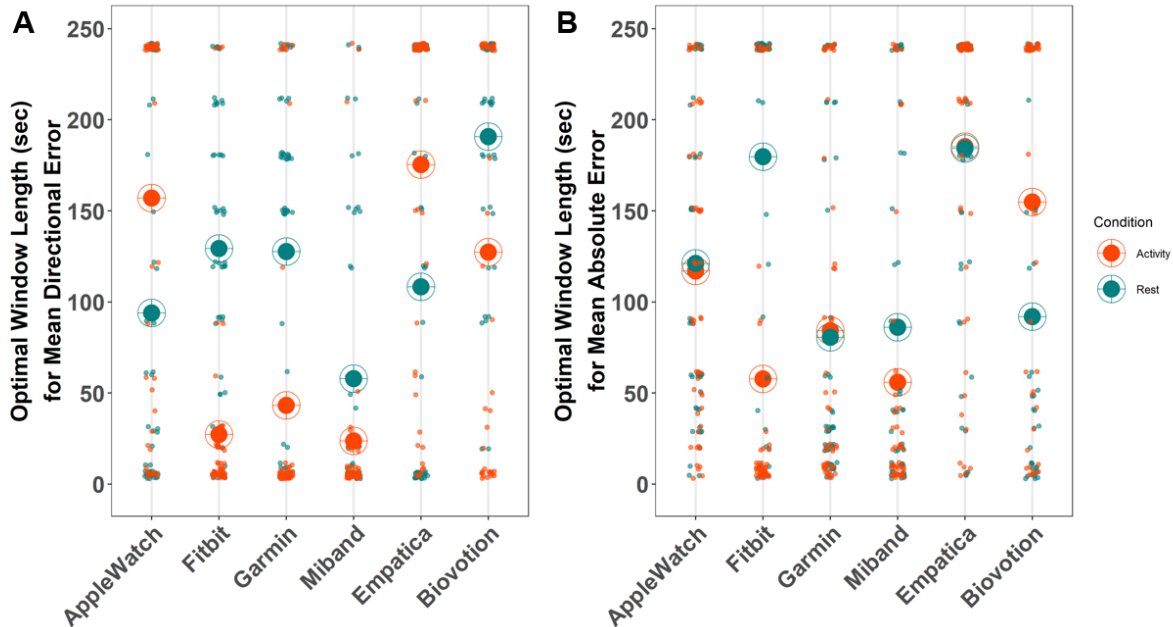

71

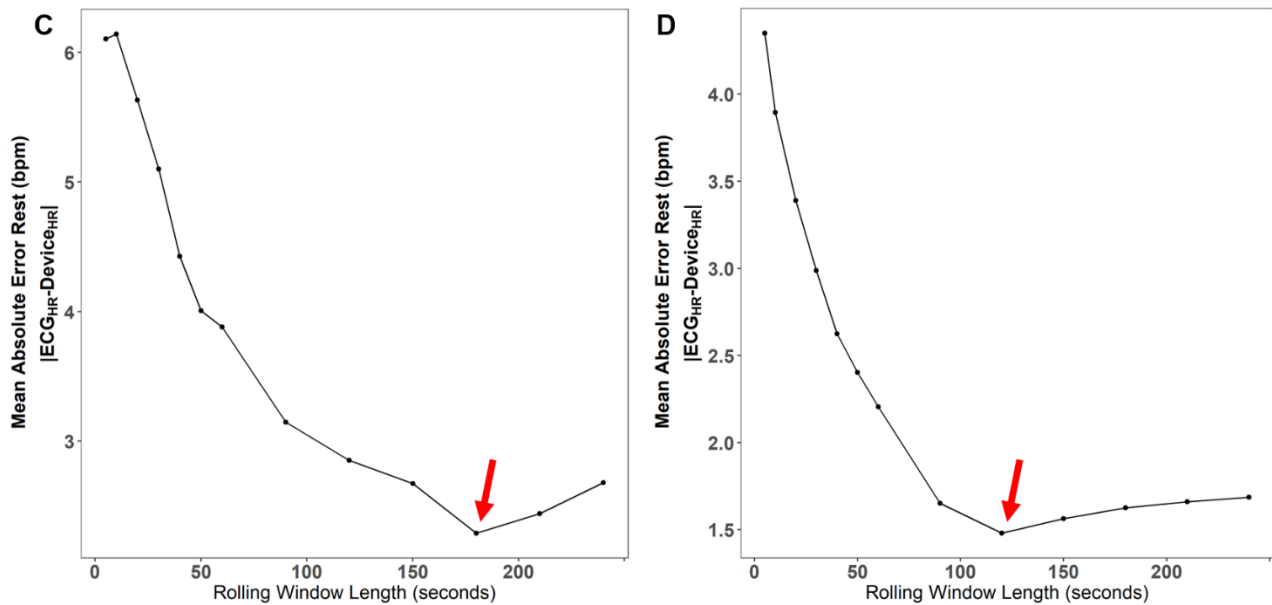

72

73 **Supplementary Figure 6.** Sensitivity analysis on window length for Mean Directional Error (A)  
 74 and Mean Absolute Error (B). Points are individual participants; target shapes are mean values  
 75 for that device over all participants for each condition- rest (teal) and physical activity (orange).  
 76 (C) and (D) show representative plots of the Mean Absolute Error across rolling windows. Red  
 77 arrows point to the optimal rolling window length used in the sensitivity analysis.

78 **Supplementary Table 1.** An analysis of devices combining cost, device release year, market  
 79 size, target market, and access to raw data during rest and activity (as a percentage of  
 80 participants) shown in this research study. \*The Empatica E4 and Biovotion Everion (only on  
 81 research application on Android) are the only devices that provide raw PPG signal to users. The  
 82 Garmin Vivosmart 3 and Xiaomi Miband provide HR data from their native app. Apple Watch 4  
 83 and Fitbit Charge 2 require non-native applications to export HR data.

| DEVICE             | COST (USD)<br>AT TIME OF STUDY                               | DEVICE<br>RELEASE<br>YEAR | MARKET SIZE<br>(2018) | TARGET MARKET             | ACCESS TO<br>RAW DATA |
|--------------------|--------------------------------------------------------------|---------------------------|-----------------------|---------------------------|-----------------------|
| APPLE WATCH 4      | \$349.00-\$459.00                                            | F 2018                    | 46.2 million          | Consumer                  | No*                   |
| FITBIT CHARGE 2    | \$129.45-\$159.99                                            | F 2016                    | 13.8 million          | Consumer                  | No*                   |
| GARMIN VIVOSMART 3 | \$92.73                                                      | S 2017                    | 10.5 million          | Consumer, active          | HR only               |
| XIAOMI MIBAND 3    | \$27.00-\$28.98                                              | S 2018                    | 23.3 million          | Consumer                  | HR only               |
| EMPATICA E4        | \$1690.00                                                    | S 2017                    | < 1 million           | Research, epilepsy        | Yes                   |
| BIOVOTION EVERION  | \$499 + annual<br>subscription (\$750<br>startup+ \$39/year) | S 2017 (est.)             | < 1 million           | Medical-grade<br>wearable | Yes*                  |

84  
 85  
 86  
 87  
 88  
 89  
 90  
 91  
 92

93 **Supplementary Table 2.** Results of literature review of number of devices being used in  
 94 research studies in PubMed and ClinicalTrials.gov. Consumer-grade device release year and  
 95 software version used for the duration of the study are shown for the specific devices used in  
 96 this study.

| Search Term        | Number of studies in PubMed | Number of studies in ClinicalTrials.gov | Device Release Year | Software version (used in this study) |
|--------------------|-----------------------------|-----------------------------------------|---------------------|---------------------------------------|
| Apple Watch 4      | 24                          | 5                                       | Fall 2018           | 5.1.3                                 |
| Fitbit Charge 2    | 61                          | 34                                      | Fall 2016           | 22.55.2                               |
| Garmin Vivosmart 3 | 11                          | 3                                       | Spring 2017         | 5.10                                  |
| Xiaomi Miband 3    | 0                           | 0                                       | Spring 2018         | NA                                    |
| Empatica E4        | 7                           | 15                                      |                     | -                                     |
| Biovotion Everion  | 0                           | 3                                       |                     | -                                     |
| Apple Watch        | 68                          | 30                                      |                     |                                       |
| Fitbit             | 476                         | 449                                     |                     |                                       |
| Garmin             | 108                         | 40                                      |                     |                                       |
| Miband             | 1                           | 2                                       |                     |                                       |
| Xiaomi Miband      | 0                           | 1                                       |                     |                                       |
| Empatica           | 20                          | 22                                      |                     |                                       |
| Biovotion          | 4                           | 4                                       |                     |                                       |



98 **Supplementary Table 3.** Mean Absolute Error in heart rate (bpm) at rest and during activity for  
 99 all devices. P-values calculated from paired, two-sided t-tests. \*\* indicates significant difference  
 100 in error between baseline and activity with a Bonferroni multiple hypothesis corrected p-value of  
 101 0.0042.

| Device                    | Absolute Error at Rest | Standard Deviation of MAE at Rest | Absolute Error During Activity | Standard Deviation of MAE During activity | P-value Absolute Error |
|---------------------------|------------------------|-----------------------------------|--------------------------------|-------------------------------------------|------------------------|
| Apple Watch               | 4.4                    | 2.7                               | 4.6                            | 3.0                                       | 0.59                   |
| Fitbit                    | 7.3                    | 4.2                               | 12.8                           | 6.8                                       | .0000019**             |
| Garmin                    | 7.0                    | 5.0                               | 9.8                            | 9.2                                       | 0.056                  |
| Miband                    | 10.2                   | 7.3                               | 13.8                           | 6.1                                       | 0.0051                 |
| E4                        | 11.3                   | 8.0                               | 12.8                           | 8.5                                       | 0.0012**               |
| Biovotion                 | 16.5                   | 6.4                               | 19.8                           | 5.3                                       | 0.38                   |
| <b>Mean</b>               | <b>9.45</b>            |                                   | <b>12.3</b>                    |                                           |                        |
| <b>Standard Deviation</b> | <b>4.2</b>             |                                   | <b>5.0</b>                     |                                           |                        |

102  
 103  
 104  
 105

106 **Supplementary Table 4.** Mean Relative Error in heart rate (bpm) at rest and during activity for  
 107 all devices. P-values calculated from paired, two-sided t-tests. \*\* indicates significant difference  
 108 in error between baseline and activity with a Bonferroni multiple hypothesis corrected p-value of  
 109 0.0042.

| Device                    | Directional Error at Rest | Standard Deviation of MDE at rest | Directional Error During Activity | Standard Deviation of MDE during activity | P-value Directional Error |
|---------------------------|---------------------------|-----------------------------------|-----------------------------------|-------------------------------------------|---------------------------|
| Apple Watch               | -0.090                    | 2.8                               | 0.79                              | 2.9                                       | 0.21                      |
| Fitbit                    | 0.34                      | 5.3                               | 7.6                               | 10.5                                      | .000018**                 |
| Garmin                    | -0.85                     | 6.2                               | 5.5                               | 11.3                                      | .00057**                  |
| Miband                    | -0.064                    | 11.7                              | 7.6                               | 10.3                                      | .000030**                 |
| E4                        | -3.9                      | 12.0                              | 6.3                               | 12.4                                      | .0000043**                |
| Biovotion                 | -13.6                     | 9.1                               | 18.9                              | 5.6                                       | 1.3e-19**                 |
| <b>Mean</b>               | <b>-3.2</b>               |                                   | <b>7.8</b>                        |                                           |                           |
| <b>Standard Deviation</b> | <b>5.4</b>                |                                   | <b>6.0</b>                        |                                           |                           |

110  
 111  
 112  
 113  
 114  
 115  
 116  
 117

118 **Supplementary Table 5.** Missingness at rest and during activity for consumer-grade devices.

|                    | Mean Missingness at Rest (% missing) | Standard Deviation of Missingness at Rest (% missing) | Mean Missingness during Activity (% missing) | Standard Deviation of Missingness during activity (% missing) | P-value paired t-test (activity vs. rest, ** indicated <0.0125) |
|--------------------|--------------------------------------|-------------------------------------------------------|----------------------------------------------|---------------------------------------------------------------|-----------------------------------------------------------------|
| Apple Watch 4      | 2.7                                  | 9.0                                                   | 3.4                                          | 23.5                                                          | 0.840                                                           |
| Fitbit Charge 2    | 18.7                                 | 12.0                                                  | 10.4                                         | 13.7                                                          | 0.00226**                                                       |
| Garmin Vivosmart 3 | 10.0                                 | 20.1                                                  | -3.7                                         | 24.9                                                          | 7.47e-07**                                                      |
| Xiaomi Miband 3    | 5.9                                  | 42.7                                                  | -14.2                                        | 43.5                                                          | 6.34e-05**                                                      |

119

120

121

122

123

124

125

126

127

128

129

130

131 **Supplementary Table 6. Mean Absolute Error in heart rate (bpm) at rest (A) and during activity**  
 132 **(B) for all devices across Fitzpatrick skin tones.**

133 **A**

|                           | 1    | 2    | 3    | 4    | 5    | 6    | Mean | Standard Deviation |
|---------------------------|------|------|------|------|------|------|------|--------------------|
| Apple Watch               | 4.7  | 5.3  | 5.1  | 3.6  | 3.1  | 4.8  | 4.4  | 0.88               |
| Fitbit                    | 7.2  | 7.2  | 7.1  | 6.8  | 8.3  | 7.1  | 7.3  | 0.52               |
| Garmin                    | 6.7  | 6.0  | 8.6  | 5.7  | 5.6  | 9.1  | 7.0  | 1.5                |
| Miband                    | 11.7 | 7.9  | 8.8  | 9.5  | 8.8  | 14.4 | 10.2 | 2.4                |
| E4                        | 12.8 | 15.6 | 10.4 | 10.7 | 8.8  | 10.4 | 11.5 | 2.4                |
| Biovotion                 | 13.8 | 16.6 | 15.4 | 18.1 | 16.8 | 18.0 | 16.5 | 1.6                |
| <b>Mean</b>               | 9.5  | 9.8  | 9.2  | 9.1  | 8.6  | 10.6 |      |                    |
| <b>Standard Deviation</b> | 3.8  | 5.0  | 3.5  | 5.1  | 4.6  | 4.8  |      |                    |

134

135 **B**

|                           | 1    | 2    | 3    | 4    | 5    | 6    | Mean | Standard Deviation |
|---------------------------|------|------|------|------|------|------|------|--------------------|
| Apple Watch               | 5.9  | 5.3  | 4.7  | 3.5  | 3.5  | 5.3  | 4.7  | 1.0                |
| Fitbit                    | 12.1 | 9.9  | 10.8 | 14.7 | 14.0 | 15.1 | 12.8 | 2.2                |
| Garmin                    | 9.9  | 9.3  | 6.2  | 16.7 | 7.1  | 9.6  | 9.8  | 3.7                |
| Miband                    | 13.8 | 12.1 | 10.3 | 20.6 | 14.5 | 12.8 | 14.0 | 3.5                |
| E4                        | 12.4 | 8.4  | 10.7 | 14.0 | 14.6 | 15.9 | 12.7 | 2.8                |
| Biovotion                 | 18.9 | 19.4 | 17.7 | 18.9 | 24.0 | 20.1 | 19.8 | 2.2                |
| <b>Mean</b>               | 12.2 | 10.7 | 10.1 | 14.7 | 13.0 | 13.1 |      |                    |
| <b>Standard Deviation</b> | 4.3  | 4.8  | 4.5  | 6.0  | 7.1  | 5.2  |      |                    |

136

137

138 **Supplementary Table 7. Mean Directional Error in heart rate (bpm) at rest (A) and during**  
 139 **activity (B) for all devices across Fitzpatrick skin tones.**

140

141 **A.**

|                           | 1     | 2      | 3     | 4      | 5      | 6      | Mean   | Standard Deviation |
|---------------------------|-------|--------|-------|--------|--------|--------|--------|--------------------|
| Apple Watch               | 0.25  | 0.04   | -0.58 | 0.30   | 0.28   | -0.62  | -0.056 | 0.43               |
| Fitbit                    | 3.72  | 1.68   | 1.23  | -1.92  | -1.58  | -0.24  | 0.48   | 2.15               |
| Garmin                    | -1.03 | 0.16   | -0.60 | -0.81  | -0.93  | -1.83  | -0.84  | 0.65               |
| Miband                    | 3.43  | -3.10  | 1.60  | 0.18   | -3.47  | 0.49   | -0.15  | 2.69               |
| E4                        | 0.44  | -7.40  | -4.08 | -1.52  | -5.76  | -4.15  | -3.74  | 2.83               |
| Biovotion                 | -10.0 | -14.25 | -9.18 | -17.05 | -14.04 | -17.32 | -13.64 | 3.43               |
| <b>Mean</b>               | -0.53 | -3.81  | -1.94 | -3.47  | -4.25  | -3.95  |        |                    |
| <b>Standard Deviation</b> | 5.00  | 6.05   | 4.08  | 6.71   | 5.24   | 6.75   |        |                    |

142

143 **B**

|                           | 1     | 2     | 3     | 4     | 5     | 6     | Mean  | Standard Deviation |
|---------------------------|-------|-------|-------|-------|-------|-------|-------|--------------------|
| Apple Watch               | 0.57  | 1.28  | 1.82  | -0.41 | 0.48  | 0.88  | 0.77  | 0.76               |
| Fitbit                    | 9.17  | 3.88  | 3.06  | 9.51  | 11.41 | 8.69  | 7.62  | 3.35               |
| Garmin                    | 5.49  | 3.25  | 2.14  | 11.35 | 3.55  | 7.31  | 5.52  | 3.40               |
| Miband                    | 9.11  | 9.85  | 7.55  | 3.79  | 5.52  | 9.59  | 7.57  | 2.45               |
| E4                        | 8.53  | 6.62  | 1.87  | 6.58  | 11.50 | 4.18  | 6.55  | 3.34               |
| Biovotion                 | 18.29 | 18.42 | 16.37 | 18.05 | 22.81 | 19.64 | 18.93 | 2.17               |
| <b>Mean</b>               | 8.53  | 7.21  | 5.47  | 8.14  | 9.21  | 8.38  |       |                    |
| <b>Standard Deviation</b> | 5.81  | 6.24  | 5.77  | 6.40  | 7.96  | 6.38  |       |                    |

144

145 **Supplementary Table 8. Missingness at rest and during activity for consumer-grade devices**

146 *across skin tones.*

|                    | Mean Missingness at Rest (% missing) | P-value unpaired t-test (skin tone vs. other skin tones) | Standard Deviation of Missingness at Rest (% missing) | Mean Missingness during Activity (% missing) | P-value unpaired t-test (skin tone vs. other skin tones) | Standard Deviation of Missingness during activity (% missing) |
|--------------------|--------------------------------------|----------------------------------------------------------|-------------------------------------------------------|----------------------------------------------|----------------------------------------------------------|---------------------------------------------------------------|
| Apple Watch 4      |                                      |                                                          |                                                       |                                              |                                                          |                                                               |
| 1                  | 3.73                                 | 0.753                                                    | 8.85                                                  | 10.22                                        | 0.624                                                    | 39.60                                                         |
| 2                  | -1.36                                | 0.0248                                                   | 4.01                                                  | -1.35                                        | 0.206                                                    | 6.15                                                          |
| 3                  | 6.09                                 | 0.166                                                    | 7.92                                                  | 15.10                                        | 0.243                                                    | 35.6-                                                         |
| 4                  | 5.07                                 | 0.443                                                    | 9.96                                                  | -3.01                                        | 0.0541                                                   | 1.74                                                          |
| 5                  | 2.42                                 | 0.941                                                    | 13.29                                                 | 4.32                                         | 0.902                                                    | 24.20                                                         |
| 6                  | -1.95E-15                            | 0.226                                                    | 7.10                                                  | -4.34                                        | 0.0201                                                   | 1.28                                                          |
| Fitbit Charge 2    |                                      |                                                          |                                                       |                                              |                                                          |                                                               |
| 1                  | 21.00                                | 0.566                                                    | 10.88                                                 | 8.51                                         | 0.636                                                    | 10.54                                                         |
| 2                  | 17.30                                | 0.739                                                    | 12.28                                                 | 4.80                                         | 0.229                                                    | 13.42                                                         |
| 3                  | 20.45                                | 0.603                                                    | 11.68                                                 | 6.26                                         | 0.254                                                    | 11.90                                                         |
| 4                  | 11.34                                | 0.0287                                                   | 9.40                                                  | 11.11                                        | 0.863                                                    | 12.58                                                         |
| 5                  | 22.28                                | 0.418                                                    | 14.55                                                 | 14.48                                        | 0.429                                                    | 16.75                                                         |
| 6                  | 19.70                                | 0.778                                                    | 12.64                                                 | 16.16                                        | 0.207                                                    | 15.54                                                         |
| Garmin Vivosmart 3 |                                      |                                                          |                                                       |                                              |                                                          |                                                               |
| 1                  | -1.44                                | 0.0561                                                   | 14.07                                                 | -12.61                                       | 0.268                                                    | 20.82                                                         |
| 2                  | 4.06                                 | 0.266                                                    | 14.47                                                 | -6.47                                        | 0.559                                                    | 11.00                                                         |
| 3                  | 15.08                                | 0.229                                                    | 12.36                                                 | 4.72                                         | 0.250                                                    | 24.46                                                         |
| 4                  | 9.76                                 | 0.963                                                    | 12.89                                                 | -6.94                                        | 0.626                                                    | 20.61                                                         |
| 5                  | 8.42                                 | 0.804                                                    | 20.09                                                 | -6.20                                        | 0.714                                                    | 21.45                                                         |
| 6                  | 19.16                                | 0.320                                                    | 33.42                                                 | 1.63                                         | 0.628                                                    | 40.20                                                         |
| Xiaomi Miband 3    |                                      |                                                          |                                                       |                                              |                                                          |                                                               |
| 1                  | -20.00                               | 0.122                                                    | 42.57                                                 | -32.11                                       | 0.0765                                                   | 22.59                                                         |
| 2                  | -14.04                               | 0.0762                                                   | 29.27                                                 | -23.42                                       | 0.236                                                    | 16.13                                                         |
| 3                  | 18.36                                | 0.0819                                                   | 15.44                                                 | -4.41                                        | 0.404                                                    | 38.84                                                         |

|   |       |       |       |        |       |       |
|---|-------|-------|-------|--------|-------|-------|
| 4 | 16.51 | 0.487 | 49.60 | -6.69  | 0.603 | 46.64 |
| 5 | 8.64  | 0.875 | 57.50 | -17.97 | 0.853 | 69.81 |
| 6 | 15.71 | 0.453 | 44.77 | -7.36  | 0.605 | 45.61 |

147

148 **Supplementary Table 9.** *Mixed Effects Comprehensive and Marginal Model Results of ANOVA*  
 149 *and Likelihood Ratio Test (interaction model) with Window Length as an effect.*

150

| Mixed Effects Model                                                       | Mean Directional Error<br>p-value(**<0.001, **<0.01, *<0.05) | Mean Absolute Error<br>p-value(**<0.001, **<0.01, *<0.05) |
|---------------------------------------------------------------------------|--------------------------------------------------------------|-----------------------------------------------------------|
| Comprehensive Model                                                       | <2.20e-16***                                                 | <2.20e-16***                                              |
| Marginal Model: Skin Tone                                                 | 0.725                                                        | 0.0901                                                    |
| Marginal Model: Window Length                                             | 1.07e-05***                                                  | 0.00135**                                                 |
| Marginal Model: Condition                                                 | <2.20e-16***                                                 | 1.26e-11***                                               |
| Marginal Model: Device                                                    | 0.0383*                                                      | <2.20e-16***                                              |
| Interaction Model: Skin Tone and Window Length<br>(Likelihood ratio test) | 0.673                                                        | 0.184                                                     |

151

152

153

154

155 **Supplementary Table 10.** *Demographic breakdown of participants in the Skin Tone Equity*  
 156 *Project. Broken down by gender, BMI, Fitzpatrick skin tone (1-6), and von Luschan skin tone (1-*  
 157 *36). In parentheses are the number of participant results used in the study (53 total), since 3*  
 158 *individuals were excluded from results due to having incomplete ECG records.*

159

|                                                                                                                         |                                       |                                     |                                     |                              |                              |                               |                               |                              |                              |
|-------------------------------------------------------------------------------------------------------------------------|---------------------------------------|-------------------------------------|-------------------------------------|------------------------------|------------------------------|-------------------------------|-------------------------------|------------------------------|------------------------------|
| <p><u>Gender</u></p> 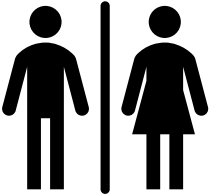                  | <p><b><u>Female</u></b></p> <p>32</p> | <p><b><u>Male</u></b></p> <p>21</p> | <p><b><u>Other</u></b></p> <p>0</p> |                              |                              |                               |                               |                              |                              |
| <p><u>Fitzpatrick Skin Tone</u></p>    | <p><b>1</b></p> <p>7</p>              | <p><b>2</b></p> <p>8</p>            | <p><b>3</b></p> <p>10</p>           | <p><b>4</b></p> <p>9</p>     | <p><b>5</b></p> <p>9</p>     | <p><b>6</b></p> <p>10</p>     |                               |                              |                              |
| <p><u>BMI</u></p>                     | <p><b>15-20</b></p> <p>13</p>         | <p><b>20-25</b></p> <p>25</p>       | <p><b>25-30</b></p> <p>11</p>       | <p><b>30-35</b></p> <p>3</p> | <p><b>40+</b></p> <p>1</p>   |                               |                               |                              |                              |
| <p><u>von Luschan Skin Tone</u></p>  | <p><b>0-12</b></p> <p>0</p>           | <p><b>12-15</b></p> <p>8</p>        | <p><b>16-18</b></p> <p>0</p>        | <p><b>19-21</b></p> <p>6</p> | <p><b>22-24</b></p> <p>8</p> | <p><b>25-27</b></p> <p>11</p> | <p><b>28-30</b></p> <p>10</p> | <p><b>31-33</b></p> <p>5</p> | <p><b>34-36</b></p> <p>4</p> |



161 (Supplementary Table 10 Image sources: BMI source: [https://study.com/academy/lesson/what-](https://study.com/academy/lesson/what-is-bmi-definition-formula-calculation.html)  
162 [is-bmi-definition-formula-calculation.html](https://study.com/academy/lesson/what-is-bmi-definition-formula-calculation.html), Fitzpatrick source: [https://perfectimage.co/whats-skin-](https://perfectimage.co/whats-skin-type-fitzpatrick-system/)  
163 [type-fitzpatrick-system/](https://perfectimage.co/whats-skin-type-fitzpatrick-system/), Von Luschan source:  
164 [https://commons.wikimedia.org/wiki/File:Felix\\_von\\_Luschan\\_Skin\\_Color\\_chart.svg](https://commons.wikimedia.org/wiki/File:Felix_von_Luschan_Skin_Color_chart.svg))
